# Supplementary material
Source: publisher figshare collection journal article supplement (https://f1000.figshare.com/articles/dataset/_/155786)
Supplement: Supplementary file 1 [file 1]

**Explanation of column headers and codes:**

BRACH_TRT - predator treatment; “present” corresponds to the presence of the predator (*Brachionus*); “absent” corresponds to the absence of the predator

DIV_TRT - prey diversity treatment; “Monoculture” corresponds to treatments with only the CBS strain of *Synura* present; “Polyculture” corresponds to treatments with all five strains of *Synura* initially present.

REP - numbered replicate identifier

LOGBRACHDENS - log10 transformed *Brachionus* density (individuals per mL) averaged over time

BRACHTEMPVAR -*Brachionus* temporal variability measured as the average of the absolute values of the residuals from linear regressions of log10 transformed *Brachionus* density versus time

LOGTOTSYNDENS - log10 transformed total cell density of *Synura* (per mL) averaged over time

LOGSYNCOLDENS - log10 transformed density of *Synura* colonies (per mL) averaged over time

RELSYNCOLCELLDENS - relative abundance (proportion) of *Synura* cells found in colonies averaged over time

SYNTOTTEMPVAR - temporal variability of total *Synura* density measured as the average of the absolute values of the residuals from linear regressions of log10 transformed *Synura* total cell density versus time

SYNFREECELLTEMPVAR- temporal variability of total *Synura* density measured as the average of the absolute values of the residuals from linear regressions of log10 transformed *Synura* total free cell density versus time

SYNCOLCELLTEMPVAR- temporal variability of total *Synura* density measured as the average of the absolute values of the residuals from linear regressions of log10 transformed density *Synura* cells found in colonies versus time
